# Supplementary material for: Association of Non-Carious Cervical Lesions with Oral Hygiene Habits and Dynamic Occlusal Parameters
Source: MDPI journal article supplement (doi:10.3390/diagnostics9020043), 2019-04-12
Supplement: s1 [file s1]

### Clinical examination data sheet

Patient Serial no:

Group: A/B

Age:

Gender: F/M

Occupation:

| Factors                                                        | High       | Normal       |
|----------------------------------------------------------------|------------|--------------|
| How Frequently do you brush your teeth?                        | >2         | 1            |
| How long do your brush your teeth?                             | >4 min     | 2-3 min      |
| Technique of brushing your teeth?                              | Horizontal | Bass         |
| What type of tooth brush do you use?                           | Hard       | Medium/ Soft |
| How often you consume citrus fruits /drinks /carbonated drinks |            |              |

Type of occlusal scheme

| Occlusal scheme | Canine guided | Group function |
|-----------------|---------------|----------------|
|-----------------|---------------|----------------|
